# Supplementary material for: Parkinson’s disease multimodal imaging: F-DOPA PET, neuromelanin-sensitive and quantitative iron-sensitive MRI
Source: PubMed Central journal article supplement (PMC8266835; doi:10.1038/s41531-021-00199-2), 2021-07-08
Supplement: 41531_2021_199_MOESM1_ESM.pdf [file 41531_2021_199_MOESM1_ESM.pdf]

### Supplementary Table 1. Definition of regressor used in the analysis

| MAP                            | REGRESSOR              |
|--------------------------------|------------------------|
| Left medial SN R2*             | Bilateral lateral ESNV |
| Left anterior putamen Ki       | Bilateral lateral ESNV |
| Bilateral posterior putamen Ki | Bilateral lateral R2*  |

ESNV (resp. R2\*) were extracted from different SN or putamen sub-regions and used as regressors in multiple regression analyses. Contrasts always involved both sides of each subregion and masks used for inference were also bilateral.

### Supplementary Figure 1. ESNV distribution.

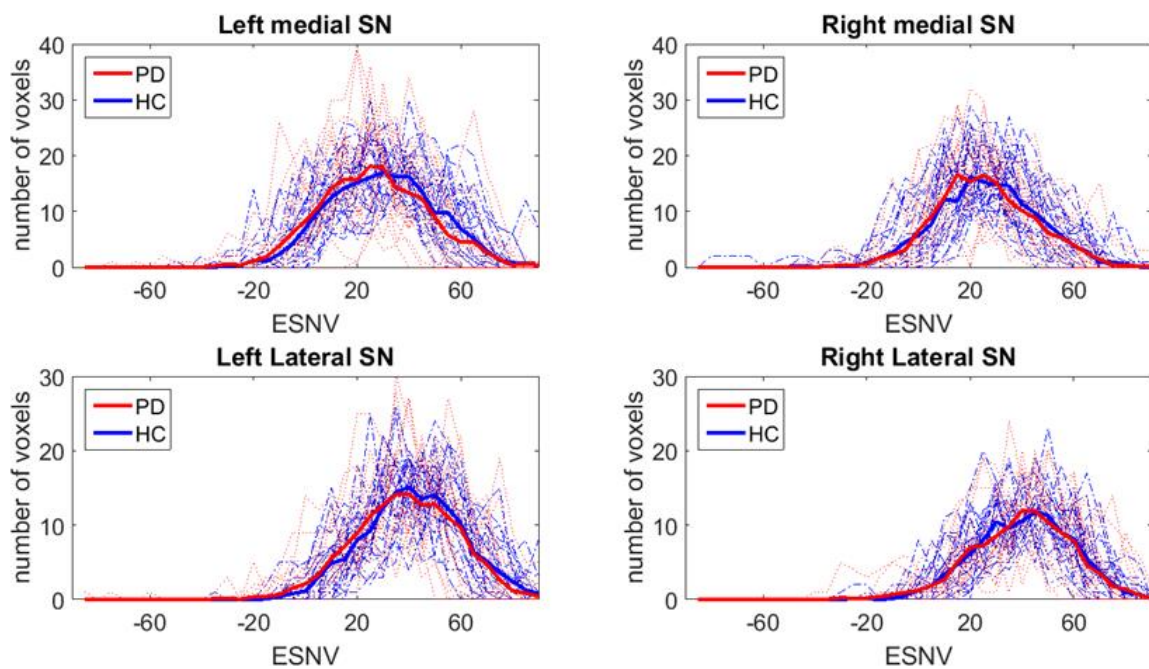

Diagrams show ESNV distribution across PD and HC populations, in all four subregions of SN (PD patients are depicted in red, and HC in blue). ESNV in PD are characterized by a larger tail of small ESNV (i.e., a more negative skewness than in HC, particularly visible on the left side).
